# Supplementary material
Source: PubMed Central journal article supplement (PMC3638877)
Supplement: NIHMS414941-supplement-1_si_001.pdf [file NIHMS414941-supplement-1_si_001.pdf]

## Supporting Information for

### *Assembly and Properties of Heterobimetallic Co<sup>II/III</sup>/Ca<sup>II</sup> Complexes with Aquo and Hydroxo Ligands*

David C. Lacy,<sup>†</sup> Young Jun Park,<sup>†</sup> Joseph W. Ziller,<sup>†</sup> Junko Yano,<sup>¶</sup> and A. S. Borovik<sup>†\*</sup>

<sup>†</sup>Department of Chemistry, University of California-Irvine, 1102 Natural Sciences II, Irvine, CA 92697; <sup>¶</sup>Physical Biosciences Division, Lawrence Berkeley National Laboratory, Berkeley, CA 94720

E-mail: aborovik@uci.edu

#### Contents

|                 |                                                                                                                             |    |
|-----------------|-----------------------------------------------------------------------------------------------------------------------------|----|
| Crystallography |                                                                                                                             | S2 |
| Table S1        |                                                                                                                             | S3 |
| Figure S1       | UV-vis spectra of the Co <sup>II</sup> complexes                                                                            | S4 |
| Figure S2a      | UV-vis titration for the synthesis of [Co <sup>II</sup> (μ-OH <sub>2</sub> )Ca <sup>II</sup> OH <sub>2</sub> ] <sup>+</sup> | S4 |
| Figure S2b      | FTIR spectra of the Co <sup>II</sup> complexes                                                                              | S4 |
| Figure S3       | Cyclic Voltammetry                                                                                                          | S5 |
| Figure S4       | EPR Spectroscopy of the Co <sup>II</sup> complexes                                                                          | S6 |
| Figure S5       | UV-vis spectra of Co <sup>III</sup> complexes in TBP symmetry                                                               | S7 |
| Figure S6       | Molecular structure of [Co <sup>III</sup> MST(OH <sub>2</sub> )]                                                            | S7 |
| Figure S7       | FTIR spectrum of [Co <sup>III</sup> (μ-OH)Ca <sup>II</sup> ] <sup>+</sup>                                                   | S8 |
| Figure S8       | UV-vis spectra for the reaction of DPH and [Co <sup>III</sup> (μ-OH)Ca <sup>II</sup> ] <sup>+</sup>                         | S8 |
| Figure S9       | EPR spectra for the reaction of DPH and [Co <sup>III</sup> (μ-OH)Ca <sup>II</sup> ] <sup>+</sup>                            | S9 |
| References      |                                                                                                                             | S9 |

## Crystallography

*General Methods.* Data collections were performed on a Bruker SMART APEX II diffractometer. The APEX2<sup>1</sup> program package was used to determine the unit-cell parameters and for data collection (25 sec/frame scan time for a sphere of diffraction data unless otherwise stated). The raw frame data were processed using SAINT<sup>2</sup> and SADABS<sup>3</sup> to yield the reflection data files. Subsequent calculations were carried out using the SHELXTL<sup>4</sup> program. The analytical scattering factors<sup>5</sup> for neutral atoms were used throughout the analyses. The structures were solved by direct methods and refined on F<sup>2</sup> by full-matrix least-squares techniques.

*Structure of Me<sub>4</sub>N[Co<sup>II</sup>MST].* A blue crystal of approximate dimensions 0.09 x 0.22 x 0.37 mm was mounted on a glass fiber. The diffraction symmetry was 2/m and the systematic absences were consistent with the monoclinic space group P2<sub>1</sub>/n that was later determined to be correct. Hydrogen atoms were included using a riding model. At convergence, wR2 = 0.0886 and Goof = 1.035 for 482 variables refined against 10021 data (0.74Å), R1 = 0.0335 for those 8583 data with I > 2.0σ(I).

*Structure of Me<sub>4</sub>N[Co<sup>II</sup>MST(OH<sub>2</sub>)].* A purple crystal of approximate dimensions 0.04 x 0.19 x 0.47 mm was mounted on a glass fiber (30 sec/frame scan time for a sphere of diffraction data). The diffraction symmetry was 2/m and the systematic absences were consistent with the monoclinic space groups Cc and C2/c. It was later determined that space group C2/c was correct. Hydrogen atoms H(1) and H(2) were located from a difference-Fourier map and refined (x,y,z and U<sub>iso</sub>). The remaining hydrogen atoms were included using a riding model. Carbon atoms C(35)-C(37) were disordered and included using multiple components with partial site-occupancy-factors. Carbon atom C(34) was refined as two components with identical constrained coordinates and thermal parameters (EXYZ and EADP)<sup>4</sup>. At convergence, wR2 = 0.0853 and Goof = 1.028 for 531 variables refined against 9573 data (0.74Å), R1 = 0.0328 for those 8063 data with I > 2.0σ(I).

*Structure of [Co<sup>II</sup>MST(μ-OH<sub>2</sub>)Ca<sup>II</sup>c15crown5-(OH<sub>2</sub>)]OTf.* A pink crystal of approximate dimensions 0.12 x 0.17 x 0.47 mm was mounted on a glass fiber (20 sec/frame scan time for a sphere of diffraction data). There were no systematic absences or any diffraction symmetry other than the Friedel condition. The centrosymmetric triclinic space group P-1 was assigned and later determined to be correct. Hydrogen atoms H(1), H(2), H(13C) and H(13D) were located from a difference-Fourier map and refined (x,y,z and U<sub>iso</sub>) with d(O-H) = 0.85Å. The remaining hydrogen atoms were included using a riding model. Least-squares analysis yielded wR2 = 0.1387 and Goof = 1.080 for 683 variables (4 restraints) refined against 13265 data (0.74Å), R1 = 0.0461 for those 11313 data with I > 2.0σ(I). There were several high residuals present in the final difference-Fourier map. It was not possible to determine the nature of the residuals although it is probable that dichloromethane solvent was present. The SQUEEZE routine in the PLATON<sup>6</sup> program package was used to account for the electrons in the solvent accessible voids.

*Structure of [Co<sup>III</sup>MST(μ-OH)Ca<sup>I</sup>c15crown5]OTf•DCM.* A brown crystal of approximate dimensions 0.09 x 0.24 x 0.34 mm was mounted on a glass fiber. There were no systematic absences or any diffraction symmetry other than the Friedel condition. The centrosymmetric triclinic space group P-1 was assigned and later determined to be correct. Hydrogen atoms were either located from a difference-Fourier map and refined (x,y,z and U<sub>iso</sub>) or were included using a riding model (mixed refinement). There was one molecule of dichloromethane solvent present. At convergence, wR2 = 0.0996 and Goof = 1.035 for 937 variables refined against 13276 data (0.74Å), R1 = 0.0346 for those 11430 data with I > 2.0σ(I).

*Structure of [Co<sup>III</sup>MST(OH<sub>2</sub>)]•DCM.* An orange crystal of approximate dimensions 0.04 x 0.10 x 0.29 mm was mounted on a glass fiber (60 sec/frame scan time for a sphere of diffraction data). There were no systematic absences nor any diffraction symmetry other than the Friedel condition. The centrosymmetric triclinic space group P-1 was assigned and later determined to be correct. Hydrogen atoms H(1) and H(2) were located from a difference-Fourier map and refined (x,y,z and

U<sub>iso</sub>). The remaining hydrogen atoms were included using a riding model. There was one molecule of dichloromethane solvent present. At convergence, wR2 = 0.0894 and Goof = 1.016 for 477 variables refined against 9099 data (0.75Å), R1 = 0.0382 for those 6795 data with I > 2.0σ(I).

Table 1. Crystal data and structure refinement for the Co-MST complexes.

|                                         | Me <sub>4</sub> N[Co <sup>II</sup> MST]                                        | Me <sub>4</sub> N[Co <sup>II</sup> MST(OH <sub>2</sub> )]                      | [Co <sup>II</sup> (μ-OH <sub>2</sub> )Ca <sup>II</sup> (OH <sub>2</sub> )OTf]                    | [Co <sup>III</sup> MST(OH <sub>2</sub> )]•CH <sub>2</sub> Cl <sub>2</sub>                                       | [Co <sup>III</sup> (μ-OH)Ca <sup>II</sup> ]OTf•CH <sub>2</sub> Cl <sub>2</sub>                                   |
|-----------------------------------------|--------------------------------------------------------------------------------|--------------------------------------------------------------------------------|--------------------------------------------------------------------------------------------------|-----------------------------------------------------------------------------------------------------------------|------------------------------------------------------------------------------------------------------------------|
| formula                                 | C <sub>37</sub> H <sub>37</sub> CoN <sub>5</sub> O <sub>6</sub> S <sub>3</sub> | C <sub>37</sub> H <sub>39</sub> CoN <sub>5</sub> O <sub>7</sub> S <sub>3</sub> | C <sub>44</sub> H <sub>69</sub> CaCoF <sub>3</sub> N <sub>4</sub> O <sub>16</sub> S <sub>4</sub> | C <sub>33</sub> H <sub>47</sub> CoN <sub>4</sub> O <sub>7</sub> S <sub>3</sub> •CH <sub>2</sub> Cl <sub>2</sub> | C <sub>45</sub> H <sub>68</sub> CaCl <sub>2</sub> CoF <sub>3</sub> N <sub>4</sub> O <sub>16</sub> S <sub>4</sub> |
| FW                                      | 822.99                                                                         | 841.00                                                                         | 1194.28                                                                                          | 851.78                                                                                                          | 1260.18                                                                                                          |
| T (K)                                   | 88(2)                                                                          | 143(2)                                                                         | 88(2)                                                                                            | 88(2)                                                                                                           | 88(2)                                                                                                            |
| crystal system                          | Monoclinic                                                                     | Monoclinic                                                                     | Triclinic                                                                                        | Triclinic                                                                                                       | Triclinic                                                                                                        |
| space group                             | <i>P</i> 2 <sub>1</sub> / <i>n</i>                                             | <i>C</i> 2/ <i>c</i>                                                           | <i>P</i> -1                                                                                      | <i>P</i> -1                                                                                                     | <i>P</i> -1                                                                                                      |
| <i>a</i> (Å)                            | 21.1381(8)                                                                     | 26.5997(15)                                                                    | 9.4438(4)                                                                                        | 7.6668(4)                                                                                                       | 11.2366(6)                                                                                                       |
| <i>b</i> (Å)                            | 9.0319(3)                                                                      | 9.6741(5)                                                                      | 17.4810(7)                                                                                       | 14.8717(8)                                                                                                      | 15.2439(7)                                                                                                       |
| <i>c</i> (Å)                            | 21.2593(8)                                                                     | 31.4984(18)                                                                    | 17.5309(7)                                                                                       | 17.4049(9)                                                                                                      | 17.5369(9)                                                                                                       |
| α (deg)                                 | 90                                                                             | 90                                                                             | 73.4591(4)                                                                                       | 92.5600(7)                                                                                                      | 71.8050(6)                                                                                                       |
| β (deg)                                 | 95.0347(4)                                                                     | 90.3563(6)                                                                     | 88.5336(4)                                                                                       | 96.5047(7)                                                                                                      | 84.3928(6)                                                                                                       |
| γ (deg)                                 | 90                                                                             | 90                                                                             | 85.2907(5)                                                                                       | 101.7540(7)                                                                                                     | 77.3591(6)                                                                                                       |
| Z                                       | 4                                                                              | 8                                                                              | 2                                                                                                | 2                                                                                                               | 2                                                                                                                |
| V (Å <sup>3</sup> )                     | 4043.1(3)                                                                      | 8105.3(8)                                                                      | 2765.0(2)                                                                                        | 1925.67(18)                                                                                                     | 2783.1(2)                                                                                                        |
| d <sub>calcd</sub> (Mg/m <sup>3</sup> ) | 1.352                                                                          | 1.378                                                                          | 1.434                                                                                            | 1.469                                                                                                           | 1.504                                                                                                            |
| Indep. Reflections                      | 10021                                                                          | 9573                                                                           | 13265                                                                                            | 9099                                                                                                            | 13276                                                                                                            |
| R1                                      | 0.0335                                                                         | 0.0328                                                                         | 0.0461                                                                                           | 0.0382                                                                                                          | 0.0346                                                                                                           |
| wR2                                     | 0.084                                                                          | 0.0803                                                                         | 0.1336                                                                                           | 0.0799                                                                                                          | 0.0945                                                                                                           |
| GOF                                     | 1.035                                                                          | 1.028                                                                          | 1.08                                                                                             | 1.016                                                                                                           | 1.035                                                                                                            |

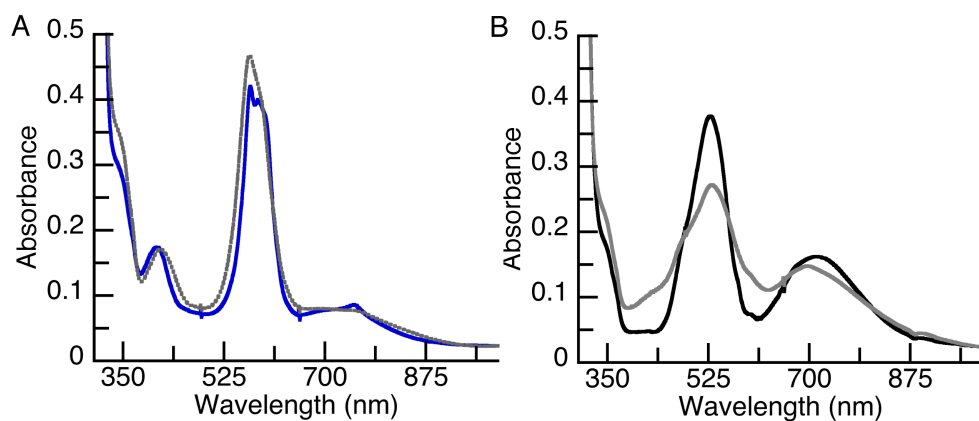

**Figure S1.** (A) UV-vis spectrum of  $[\text{Co}^{\text{II}}\text{MST}]^-$  (blue) and after the addition of 1 equiv  $\text{Ca}(\text{OTf})_2/15\text{-crown-5}$  (dotted grey). (B) UV-vis spectrum of  $[\text{Co}^{\text{II}}\text{MST}(\text{OH}_2)]^-$  (black) and  $[\text{Co}^{\text{II}}(\mu\text{-OH}_2)\text{Ca}^{\text{II}}\text{OH}_2]^+$  (grey). Conditions:  $\sim 10$  mM, DCM, 1 cm path length cell.

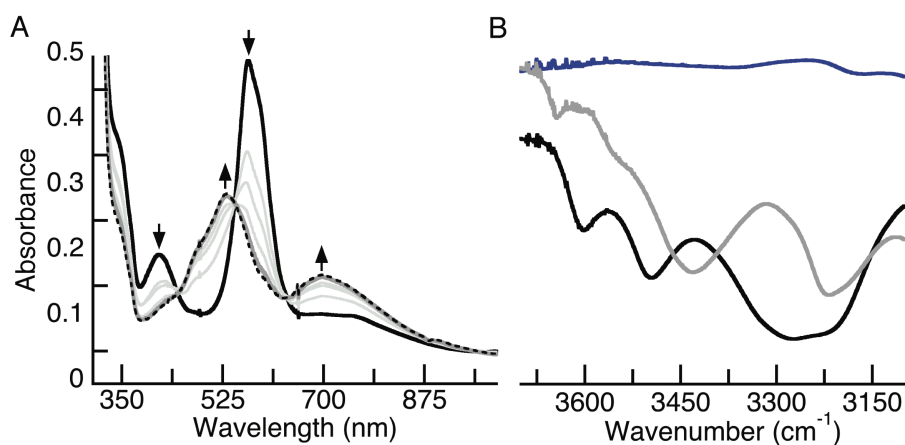

**Figure S2.** (A) The titration of a mixture of 0.5 mM  $[\text{Co}^{\text{II}}\text{MST}]^-$  (DCM) and 1 equiv  $\text{Ca}(\text{OTf})_2/15\text{-crown-5}$  (black) with water was followed by UV-vis spectroscopy in a 1 cm cuvette. The light grey lines correspond to 0.33, 0.50, 0.66, and 1.00 (dark grey) and up to 1000 equiv (dashed black line) of water. (B) FTIR spectra of the  $\nu\text{OH}$  region for  $\text{Me}_4\text{N}[\text{Co}^{\text{II}}\text{MST}]$  (blue),  $\text{Me}_4\text{N}[\text{Co}^{\text{II}}\text{MST}(\text{OH}_2)] \cdot 2\text{H}_2\text{O}$  (black) and  $[\text{Co}^{\text{II}}(\mu\text{-OH}_2)\text{Ca}^{\text{II}}\text{OH}_2]\text{OTf}$  (grey).

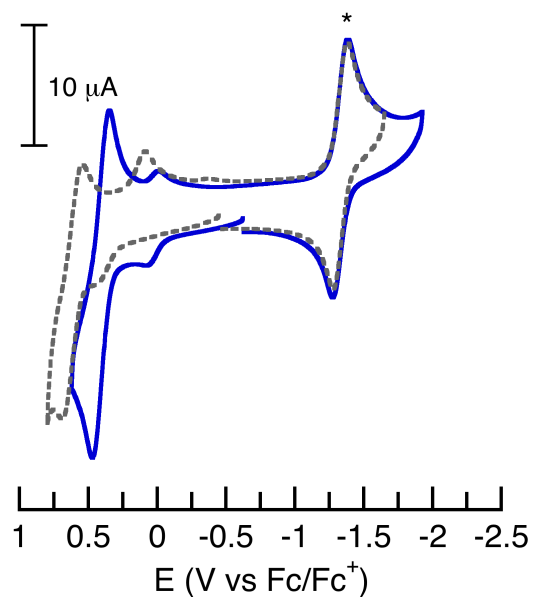

**Figure S3.** Cyclic voltammograms of  $[Co^{II}MST]^-$  (solid blue) and after the addition of 1 equiv  $Ca(OTf)_2/15$ -crown-5 (dashed grey). Cobaltocenium (\*) was used as an internal reference. Scan rate 0.1 V/s; solvent, DCM; electrolyte, 100mM TBAP; analyte, 1mM complex at rt; working electrode, glassy carbon; reference electrode, silver wire; counter electrode, platinum wire.

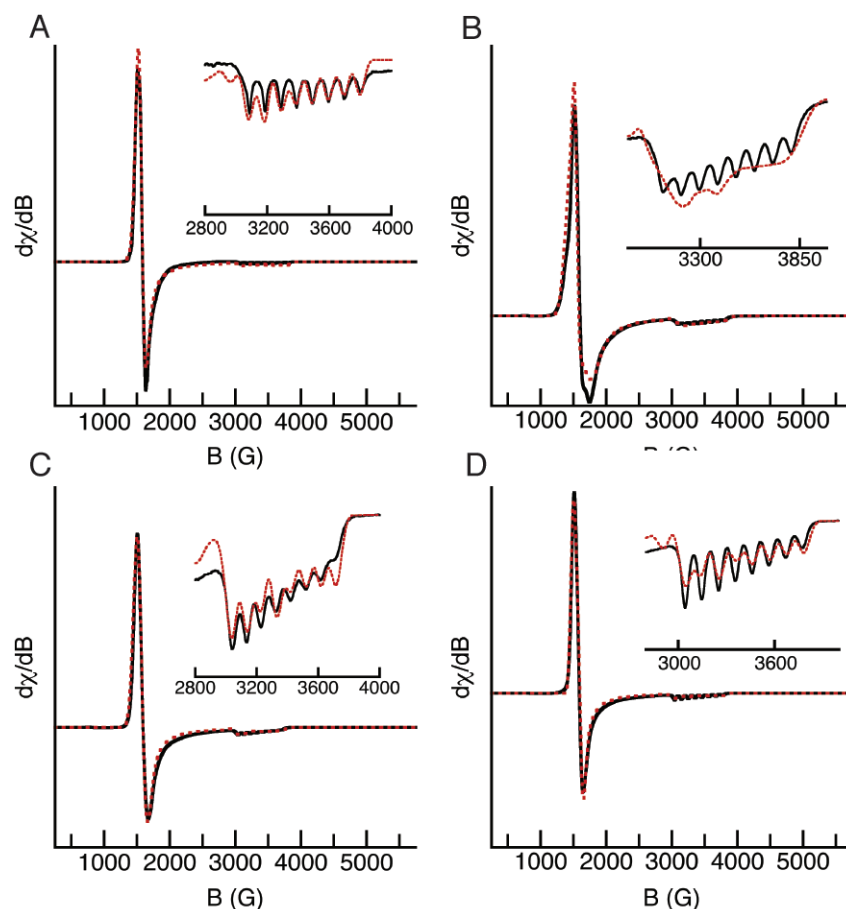

**Figure S4.** EPR spectra (black) and simulations (dashed red) of  $[\text{Co}^{\text{II}}\text{MST}]^-$  (A), simulation parameters:  $D = 2$ ,  $E/D = 0.010$ ,  $g_x = 2.247$ ,  $g_y = 2.210$ ,  $g_z = 2.004$ ,  $A_z = 96 \times 10^{-4} \text{ cm}^{-1}$ ;  $[\text{Co}^{\text{II}}\text{MST}]^- + \text{Ca}(\text{OTf})_2/15\text{-crown-5}$  (B), simulation parameters:  $D = 2 \text{ cm}^{-1}$ ,  $E/D = 0.049$ ,  $g_x = 2.230$ ,  $g_y = 2.252$ ,  $g_z = 2.000$ ,  $A_z = 94 \times 10^{-4} \text{ cm}^{-1}$ ;  $[\text{Co}^{\text{II}}\text{MST}(\text{OH}_2)]^-$  (C), simulation parameters:  $D = 2 \text{ cm}^{-1}$ ,  $E/D = 0.0236$ ,  $g_x = 2.315$ ,  $g_y = 2.157$ ,  $g_z = 2.0437$ ,  $A_z = 90 \times 10^{-4} \text{ cm}^{-1}$ ;  $[\text{Co}^{\text{II}}(\mu\text{-OH}_2)\text{Ca}^{\text{II}}\text{OH}_2]^+$  (D), simulation parameters:  $D = 2 \text{ cm}^{-1}$ ,  $E/D = 0.030$ ,  $g_x = 2.248$ ,  $g_y = 2.210$ ,  $g_z = 2.0252$ ,  $A_z = 98 \times 10^{-4} \text{ cm}^{-1}$ . All samples were prepared to be 6mM in concentration in DCM and recorded at 10K with the following experimental parameters: frequency 9.64 GHz, power 0.20 mW, modulation amplitude 9.02 G, time constant 20.48 s, conversion time 40.96 s. Inset show zoomed in view of the hyperfine structure and simulation.

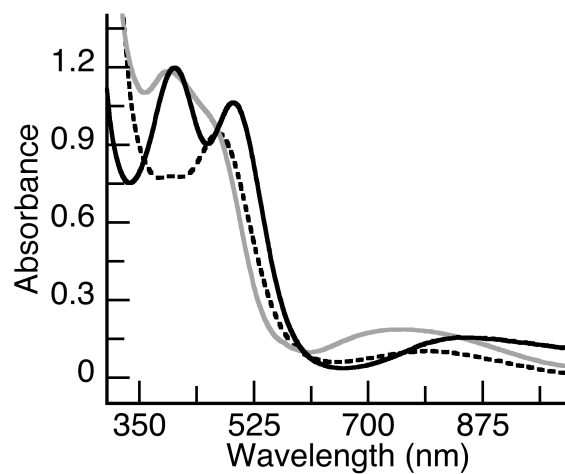

**Figure S5.** UV-vis spectra of  $[\text{Co}^{\text{III}}\text{H}_3\text{buea}(\text{OH})]^-$  (dashed black, DMA, 0.2 M, rt),  $[\text{Co}^{\text{III}}\text{MST}(\text{OH}_2)]$  (solid black, DCM, 0.2 M), and  $[\text{Co}^{\text{III}}(\mu\text{-OH})\text{Ca}^{\text{II}}]^+$  (solid grey, DCM, 0.2 M). The  $[\text{Co}^{\text{III}}\text{H}_3\text{buea}(\text{OH})]^-$  complex was synthesized using literature procedures.<sup>7</sup>

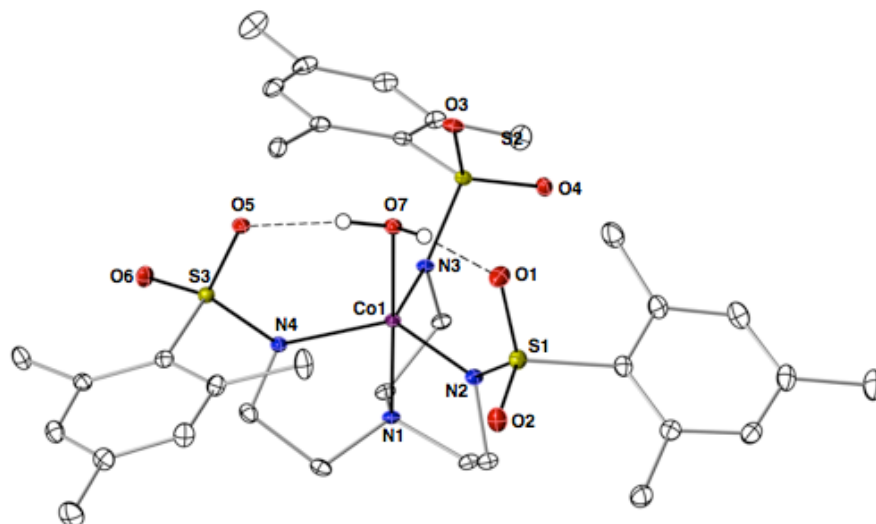

**Figure S6.** Thermal ellipsoid diagram depicting the molecular structure of  $[\text{Co}^{\text{III}}\text{MST}(\text{OH}_2)]$ . The thermal ellipsoids are drawn at the 50% probability level and only the hydrogen atoms of the aquo ligand are shown for clarity.

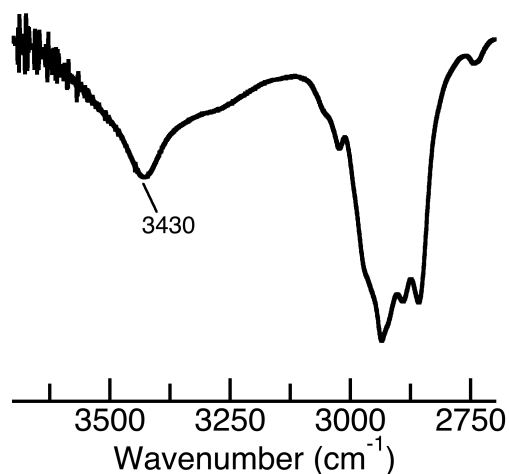

**Figure S7.** FTIR spectrum of a KBr pellet of  $[\text{Co}^{\text{III}}(\mu\text{-OH})\text{Ca}^{\text{II}}]\text{OTf}$  showing the strong  $\nu(\text{OH})$  at  $3430\text{ cm}^{-1}$ .

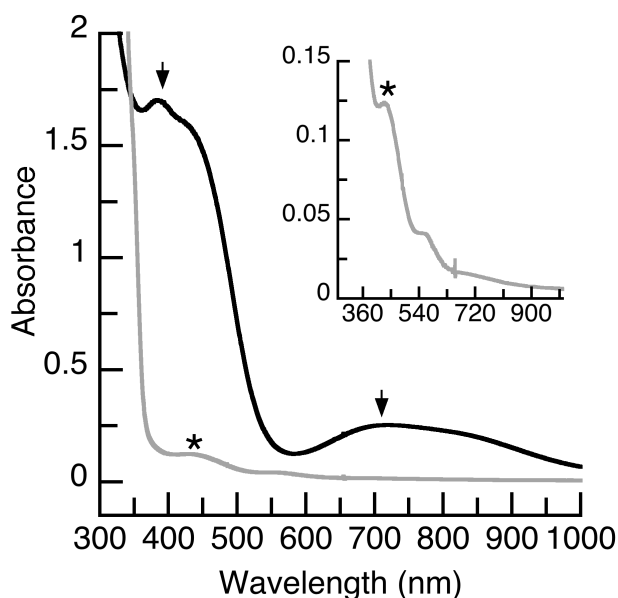

**Figure S8.** UV-vis spectrum of  $[\text{Co}^{\text{III}}(\mu\text{-OH})\text{Ca}^{\text{II}}]^+$  before (black) and 22 min after the addition of DPH (grey): the inset is a zoomed in view of the grey line (azobenzene (\*)). Conditions: A solution of  $[\text{Co}^{\text{III}}(\mu\text{-OH})\text{Ca}^{\text{II}}]^+$  (4 mL,  $400\text{ }\mu\text{M}$ ) was treated with a DCM solution of DPH ( $80\text{ }\mu\text{L}$ ,  $0.29\text{ M}$ ,  $\sim 10\text{-}20$  equiv) and allowed to react in a 1 cm cuvette at  $20^\circ\text{C}$ . The yield of azobenzene was 70% (based on unreacted DPH) determined by performing the experiment with  $[\text{Co}^{\text{III}}(\mu\text{-OH})\text{Ca}^{\text{II}}]^+$  (1 mL, 5 mM) and DPH (9.2 mg, 0.05 mmol) in  $\text{DCM-}d_2$  with toluene as an internal standard.



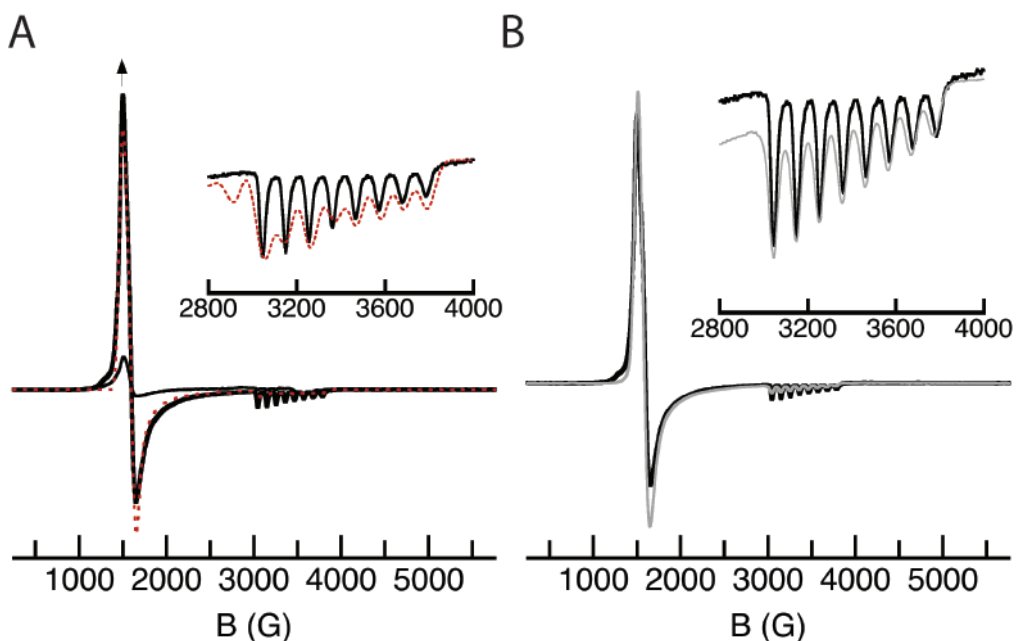

**Figure S9.** (A) EPR spectrum of  $[\text{Co}^{\text{III}}(\mu\text{-OH})\text{Ca}^{\text{II}}]^+$  before and after treatment with 10 equiv DPH (black). The product of the reaction was simulated (dashed red) using the same parameters used to simulate  $[\text{Co}^{\text{II}}(\mu\text{-OH}_2)\text{Ca}^{\text{II}}\text{OH}_2]^+$  (Figure S4D). (B) For comparison, the EPR spectra of  $[\text{Co}^{\text{II}}(\mu\text{-OH}_2)\text{Ca}^{\text{II}}\text{OH}_2]^+$  (grey) is overlaid with the product of the reaction between  $[\text{Co}^{\text{III}}(\mu\text{-OH})\text{Ca}^{\text{II}}]^+$  and DPH (black). Experimental conditions are the same as used in Figure S4. Inset show a zoomed in view of the  $g = 2$  region.

## References

1. APEX2 Version 2010.9-1, Bruker AXS, Inc.; Madison, WI 2010.
2. SAINT Version 7.68a, Bruker AXS, Inc.; Madison, WI 2009.
3. Sheldrick, G. M. SADABS, Version 2008/1, Bruker AXS, Inc.; Madison, WI 2008.
4. Sheldrick, G. M. SHELXTL, Version 2008/4, Bruker AXS, Inc.; Madison, WI 2008.
5. International Tables for X-Ray Crystallography **1992**, Vol. C., Dordrecht: Kluwer Academic Publishers.
6. Spek, A. L. PLATON, Acta. Cryst. **2009**, D65, 148-155
7. Hammes, B. S.; Young, Jr. G. V.; Borovik, A. S. *Angew. Chem. Int. Ed.* **1999**, 38, 666-669.
